1 **DOWN FEATHER STRUCTURE VARIES BETWEEN LOW- AND HIGH-ALTITUDE TORRENT DUCKS**  
2 **(*MERGANETTA ARMATA*) IN THE ANDES**

3

4 **Rebecca G. Cheek<sup>1,2\*</sup>, Luis Alza<sup>1,3,4†</sup>, Kevin G. McCracken<sup>1,3,4,5,6</sup>**

5

6 <sup>1</sup> University of Alaska Museum, Department of Biology & Wildlife, & Institute of Arctic Biology,  
7 Fairbanks, AK 99775, USA

8 <sup>2</sup> Department of Biology, Graduate Degree Program in Ecology, Colorado State University, Fort  
9 Collins, CO 80526, USA

10 <sup>3</sup> Department of Biology, University of Miami, Coral Gables, FL 33146, USA

11 <sup>4</sup> Centro de Ornitología y Biodiversidad - CORBIDI, Lima 33, Peru

12 <sup>5</sup> Department of Marine Biology and Ecology, Rosenstiel School of Marine and Atmospheric  
13 Sciences, University of Miami, Coral Gables, FL 33146, USA

14 <sup>6</sup> Human Genetics & Genomics, Hussman Institute for Human Genomics, University of Miami  
15 Miller School of Medicine, Miami, FL 33136, USA

16 \* Corresponding author email: [Rebecca.G.Cheek@gmail.com](mailto:Rebecca.G.Cheek@gmail.com)

17 † Corresponding author email: [luis.alza@corbidi.org](mailto:luis.alza@corbidi.org)

18

19

20

21

22

23 **Abstract**

24 Feathers are one of the defining characteristics of birds and serve a critical role in thermal  
25 insulation and physical protection against the environment. Feather structure is known to vary  
26 among individuals, and it has been suggested that populations exposed to different  
27 environmental conditions may exhibit different patterns in feather structure. We examined both  
28 down and contour feathers from two populations of male Torrent Ducks (*Merganetta armata*)  
29 from Lima, Peru, including one high-altitude population from the Chancay-Huaral River at  
30 approximately 3500 meters (m) elevation and one low-altitude population from the Chillón  
31 River at approximately 1500 m. Down feather structure differed significantly between the two  
32 populations. Ducks from the high-altitude population had longer, denser down compared with  
33 low-altitude individuals. Contour feather structure varied greatly among individuals but showed  
34 no significant difference between populations. These results suggest that the innermost,  
35 insulative layer of plumage (the down), may have developed in response to lower ambient  
36 temperatures at high elevations. The lack of observable differences in the contour feathers may  
37 be due to the general constraints of the waterproofing capability of this outer plumage layer.

38

39

40

41

42 **Key Words:** Andes, contour feather, down feather, feather structure, *Merganetta armata*,

43 **Peru, temperature variation, Torrent Duck**

44 **Resumen**

45 El plumaje es una característica que define a las aves y cumple roles críticos en el aislamiento  
46 térmico y protección física del ambiente. Se sabe que la estructura de las plumas varía ente  
47 individuos, y se ha sugerido que poblaciones expuestas a diferentes condiciones ambientales  
48 pueden exhibir diferentes patrones en la estructura de las plumas. En este estudio se  
49 examinaron tanto el plumón como las plumas de contorno de machos adultos del Pato de los  
50 Torrentes (*Merganetta armata*) de dos poblaciones, una en el río Chancay-Huaral a 3,500 msnm  
51 y otra en el río Chillón a 1,500 msnm, ubicadas en Lima, Perú. La estructura de los plumones  
52 difiere significativamente entre las dos poblaciones. Los patos de la población a grandes  
53 elevaciones tienen plumones largos, y densos comparados con los individuos de las partes bajas.  
54 La estructura de las plumas de contorno varía ampliamente entre individuos pero no muestra  
55 diferencias significativas entre poblaciones. Estos resultados sugieren que las diferencias entre  
56 las capas interiores de aislamiento del plumaje (plumón), haberse desarrollado como respuesta  
57 en ambientes de bajas temperaturas a grandes elevaciones. En cambio la falta de detectables  
58 diferencias en las plumas de contorno puede ser debido a la constante selección en la capacidad  
59 impermeable de la capa de plumas exteriores.

60

61

62

63

64

65

66

67 INTRODUCTION

68 Plumage is one of the defining characteristics of birds and serves a critical role in multiple  
69 functions including communication, flight, and thermal insulation. Indeed, a reigning theory on  
70 the original function of primitive feathers is that they enabled early bird-like dinosaurs to evolve  
71 homeothermy (Ostrom 1974; Prum and Brush 2002; Pap et al. 2017), and modern plumage acts  
72 as a highly efficient thermal buffer against conductive and convective heat loss both in the air  
73 and underwater (Walsberg 1988). All birds shed old and damaged feathers during periodic  
74 molts, which is demanding in terms of energy, time, and nutrients so that molting individuals  
75 often experience trade-offs between other strenuous periods of the lifecycle such as breeding  
76 and migration (Murphy & King 1992). Plumage structure varies between species occupying  
77 different habitats (Pap et al. 2017), and is a highly plastic trait that varies between individuals  
78 depending on environmental and physiological factors during feather growth (Strochlic &  
79 Romero 2008; Butler, Leppert, & Dufty Jr 2010; Moreno-Rueda 2010; Pap et al. 2008, 2013).  
80 Therefore, comparing the plumage structure between birds inhabiting different environmental  
81 conditions can provide insights into how birds respond to the selection pressures that  
82 contribute to this variation.

83         The body plumage of birds can be broadly divided into two categories: contour, and  
84 down. Contour feather structure follows a standard plan of regularly spaced branches (barb)  
85 along a central vane (rachis) that has a short basal portion (calamus) imbedded in the skin. Each  
86 barb repeats a similar plan with many smaller branches (barbules) densely spaced along either  
87 side of the barb. Contour feathers may be further characterized by the exposed, pennaceous  
88 (ridged; distal) part of the vane, which aids in water repellency and protection, whereas the

89 plumulaceous (downy; proximal) section provides thermal insulation, recognized through stark  
90 differences in barb and barbule texture (Stettenheim 2000; Figure 1). Proportion of  
91 plumulaceous barbs, as well as barb and barbule density are thought to determine the amount  
92 of air trapped near the skin (Middleton 1986; Butler, Rohwer & Spidel 2008; Broggi et al. 2011,  
93 Pap et al. 2017), thereby influencing thermoregulatory capacity (Walsberg 1988). A thicker  
94 downy coat composed of longer, denser plumulaceous barbs makes intuitive sense for birds  
95 living in colder environments, whereas birds living in hotter environments should have a looser  
96 plumage structure to allow them to prevent heat absorption by increasing external surface area  
97 of the plumage (Walsberg & King 1978).

98         In ducks (Anatidae), contour feathers with diester waxes from the preen gland cover  
99 most of the body along discrete tracts and provide an impenetrable waterproof covering over a  
100 thick layer of insulating down feathers (Stephenson & Andrews 1997; Stettenheim 2000). As the  
101 production of feathers is costly, it would be advantageous for individuals to produce an optimal  
102 plumage for the thermal conditions of their given aquatic or terrestrial environment. The  
103 energetic costs associated with having suboptimal plumage could be substantial in waterfowl, as  
104 thermoregulation can account for 28% of the daily energy expenditure (McKinney & McWilliams  
105 2005). Recent years have seen an increase of studies characterizing interpopulation variation of  
106 feather structure due to environmental variation (Middleton 1986; Broggi et al 2011; Gamero et  
107 al. 2015; Koskenpato et al. 2016), but few have focused on waterfowl or comparative data  
108 describing down feathers among species or populations inhabiting different environments (but  
109 see Pap et al. 2017; D'alba et al. 2017).

110 Torrent Ducks (*Merganetta armata*) are specialized riverine ducks that inhabit many of  
111 the rivers along the Andes from Venezuela to Tierra del Fuego (Fjeldså & Krabbe 1990). This  
112 species is characterized as a small bodied (350-550g; Alza et al. 2017) diving duck that forages  
113 primarily on aquatic insects by gleaning the surface of submerged boulders (Cerón 2010). *M.*  
114 *armata* form monogamous pairs, and both sexes cooperate in the defense an approximate 1-2  
115 kilometer stretch of river they inhabit year round (Moffet 1970). *M. armata* is an ideal organism  
116 to study the environmental correlates of feather structure as they occur in elevations that range  
117 from 300 to over 4,000 meters (m) (Fjeldså & Krabbe 1990). In Peru, a steep environmental  
118 gradient usually consists of an extremely diverse variety of ecological and topographic  
119 conditions. On the west slope of the Andes, for example, low-altitude areas along the central  
120 coast consist of hot to mild arid deserts interspersed by lush river valleys and lomas (hills) that  
121 give way to very cold semi-arid grasslands and glacier-carved montane valleys at higher  
122 elevations (Peel, Finlayson & McMahon, 2007; Cheek pers. obs.).

123 In a recent study of *M. armata* in the Andes, Gutiérrez-Pinto et al. (2014) found a  
124 significant difference in morphological traits, with larger males in low-altitude areas compared  
125 to high-altitude areas in Peru. It was speculated that the physiological costs of living in a cold,  
126 hypoxic environment is responsible for the observed difference in body mass and skull length  
127 along an elevational gradient, but other physiological mechanisms that could allow *M. armata*  
128 to cope in harsh environments (i.e. insulation and daily energy expenditure) have not been fully  
129 described. It has further been observed that *M. armata* in Peru have very little subcutaneous fat  
130 (Gutiérrez-Pinto et al., 2014; Cheek pers. obs.), and a concurrent analysis using the same  
131 individuals used in this study found no significant difference in resting  $O^2$  consumption between

132 low- and high-altitude individuals (Ivy pers comm.). Additionally, Dawson et al. (2016) did not  
133 find a significant difference in the respiratory (aerobic) capacity in the pectoralis flight muscles  
134 of low- and high-altitude *M. armata* individuals from this study. As flight muscles are credited  
135 for a majority of thermogenesis in birds (Butler 1997; Petit & Vézina 2014), these results suggest  
136 that these animals do not appear to be altering their metabolic rate to compensate for lower  
137 temperatures at higher elevations. Therefore, we predict that *M. armata* plumage structure will  
138 reflect differences due to environmental temperatures associated with low- and high-altitude  
139 thermal environments.

140 In this study, we compared body plumage by examining down and contour feather  
141 structure between two populations of *M. armata* living at two elevational extremes of their  
142 distribution characterized by strong differences in environmental temperatures. This allowed us  
143 to address the question: Do key structural attributes in *M. armata* feather insulation differ  
144 between populations living in different elevations and temperatures, and do those difference  
145 reflect patterns predicted for a diving duck inhabiting cold, hypoxic environments?

146

## 147 METHODS

148 Twelve adult, male *Merganetta armata* were collected from two rivers in the Department of  
149 Lima, Peru (Appendix); six individuals in the Rio Chancay-Huaral (>3,000 m; Figure 2), and six  
150 individuals in the Rio Chillón (<2,000 m; Figure 2), hereafter referred to as the low- and high-  
151 altitude populations respectively. The low-altitude study area consists of a mosaic of farmland  
152 and thick vegetation along the riverbank, characterized by mean annual temperatures of  
153 approximately 20°C and water temperatures of 19°C (Ayala, Ministerio de Agricultura y Riego

154 2013). The high-altitude study area consists of alpine river valleys with mean annual  
155 temperatures of approximately 12°C and water temperatures of 11°C (Vargas, Ministerio de  
156 Agricultura y Riego 2015). Though the two populations are geographically isolated in different  
157 watersheds, there is moderate levels of gene flow between and across the river systems (Alza et  
158 al. unpublished data), indicating that these populations are not genetically structured.

159 Ducks from the low and high-altitude populations were euthanized from 7<sup>th</sup> to 18<sup>th</sup>  
160 August 2015 as part of a concurrent study by the University of Miami and McMaster University  
161 (Dawson et al. 2016). There is no reason to expect differences in timing of molt to be a factor, as  
162 all animals were sampled within the same two-week time span. Skins were collected from each  
163 animal, coated in salt, and stored in a -18°C freezer until subsequent analysis. Feather structure  
164 analyses were undertaken in January 2016 in the Centro de Ornitología y Biodiversidad  
165 (CORBIDI) laboratory in Lima, Peru. After the skins were thoroughly washed and dried, five  
166 down and five contour feathers (minimal sample size for a boxplot comparison, Krzywinski &  
167 Altman 2014) were randomly plucked from the upper right pectoral feather tract of each  
168 individual. Feathers were plucked and handled with tweezers, and otherwise stored in glassine  
169 envelopes. Skins were later deposited in the Ornithology Study Skin Collection at CORBIDI  
170 (Appendix).

### 171 **Feather Structure**

172 We measured six different traits as described by Middleton (1986) and Broggi (2011) to describe  
173 feather structure. Feather length (without calamus) for both down and contour feathers was  
174 measured by photographing each feather parallel to a metric ruler. ImageJ software (version  
175 1.50b; Schneider, Rasband, and Eliceiri 2012) was used to calculate feather length with the



176 measuring tool recalibrated for each photo (Figure 1). All photographs and analyses were  
177 carried out by the same person (R.C.).

178 Fine down feather structure was analyzed with the help of a stereoscopic microscope.

179 *M. armata* down plumage is dense, with barbs regularly spaced along two rachides attached to

180 the calamus. To describe down feather structure, photographs were taken of a single rachis of

181 each feather at 0.8X objective with a camera mounted to the lens. Photographs were analyzed

182 using the ImageJ multi-point count tool to determine total number of barbs along a single rachis

183 for each down feather. Additional feather traits were measured for all contour feathers

184 including: length of plumulaceous portion of each feather, and number of barbs within a 3.5 mm

185 section of the plumulaceous and pennaceous portions of each section (0.8X). Thus, the variables

186 measured were the 1) number of barbs, 2) total length of down feathers; density of barbs from

187 the 3) plumulaceous and 4) pennaceous portions of contour feathers, 5) total length of contour

188 feather, and 6) proportion of plumulaceous barbs with respect to all barbs.

### 189 **Statistical Analysis**

190 All data were analyzed in R version 3.3.1 (R Core Team, 2017). All variables except the density of

191 barbs (count data) were normally distributed (Shapiro-Wilk test). To assess the variation in the

192 different feather structure traits by location, we used mixed models controlling for repeated

193 measures (5 feathers per individual). Linear mixed-effects models were used for continuous

194 variables (length and proportion) and generalized linear mixed-effects models for count

195 variables (density of barbs) with a Poisson distribution. Each feather trait was a dependent

196 variable, whereas sampling location (high- and low-altitude populations, fixed effect), and

197 individual (each of the 12 *M. armata* sampled, random effect) were independent variables.

198 Confidence intervals for location (fixed effect) variable, were calculated using the R function  
199 *confint* for the non-normally distributed count data, and the function *diffsmeans* for the  
200 continuous data. Finally, we estimated and compared the coefficient of variation for each  
201 feather trait by location.

202

## 203 RESULTS

204 Down feathers of individuals from high-altitude were, on average, longer and had a greater  
205 number of barbs compared to individuals from low-altitude ( $F_{\text{Length}}=11.815$ ,  $P_{\text{Length}}=0.006$ ;  
206  $F_{\text{Barbs}}=8.008$   $P_{\text{Barbs}}=0.004$ ,  $df= 10$ ; Figure 3A & 3B). For down length, a 95% confidence interval of  
207 the location parameter did not intersect zero  $CI_{\text{Length}} [-3.22, -0.688]$ , and for barb number the  
208 parameter did not intersect zero  $CI_{\text{Barbs}} [-0.201, -0.036]$ .

209 Contour feather structure varied greatly between individuals (length) and showed no  
210 significant differences between the two populations. Total length of contour feathers did not  
211 differ between the populations ( $F_{\text{Length}}=0.099$ ,  $P_{\text{Length}}= 0.759$ ,  $df= 10$ ,  $CI_{\text{Length}} [-2.59,3.45]$ , Figure  
212 3C), and the proportion of plumulaceous barbs relative to total number of barbs showed no  
213 significant difference between the two populations ( $F_{\pi\text{Plumulaceous}}=1.739$ ,  $P_{\pi\text{Plumulaceous}}= 0.216$ ,  $df=$   
214  $10$ ,  $CI_{\pi\text{Plumulaceous}} [-0.007, 0.03]$ , Figure 3D). Barb number from the plumulaceous section of the  
215 feathers did not differ significantly between the two populations ( $F_{\text{BarbsPlumulaceous}}=2.364$ ,  
216  $P_{\text{BarbsPlumulaceous}}=0.124$ ,  $df= 10$ , Figure 3E) as indicated by a 95% confidence interval using of the  
217 location parameter  $CI_{\text{BarbsPlumulaceous}} [-0.143,0.021]$ . The number of barbs from the pennaceous  
218 section was highly variable, and the residuals were skewed left by a single noticeable outlier in  
219 the low-altitude population. However, when this outlier was removed there were still no

220 observable differences shown between the populations, so the results presented here include  
221 all data ( $F_{\text{BarbsPennaceous}}=0.1468$ ,  $P_{\text{BarbsPennaceous}}= 0.702$ ,  $df=10$ ,  $CI_{\text{BarbsPennaceous}} [-0.119,0.080]$ ; Figure  
222 3F). Average plumage traits between localities varied more in the low-altitude population  
223 compared to the high-altitude individuals sampled (Table 1).

224

## 225 DISCUSSION

226 Down structure differed between low- and high-altitude individuals of adult male  
227 *Merganetta armata* in the west slope of the Andes in Lima, Peru. *Merganetta armata* sampled  
228 from the high-altitude study area (Figure 2) had longer, denser down plumage in the pectoral  
229 tract compared to the low-altitude study area (Figure 3). Research has shown that differences in  
230 down microstructure are related to differences in insulative properties, as long fibers increase  
231 the air-trapping capacity of the feather (D'alba et al. 2017). While our observed differences may  
232 appear inconsequential from feather to feather, a difference of 3-4 barbs and 2mm of length in  
233 the average down feather across the whole body would be expected to have substantial effects  
234 on the overall plumage of the animal. This suggests our observed differences in *M. armata*  
235 down reflect the demands of contrasting environments in the low- and high-altitude  
236 temperature regimes of the Peruvian Andes.

237 The lack of observable differences between the contour feathers of the low- and high-  
238 altitude samples could be caused by a diversity of constraints compared with down feathers.  
239 First, contour feathers were more variable within individuals (five feathers per individual) than  
240 between populations (six individuals per population), which could be due to natural variation  
241 among individuals. Second, there is no standard method for quantifying feather structure

242 (Butler et al. 2008), so it is possible that different variables in the contour feathers such as: barb  
243 angle (Butler, Rohwer, & Speidel 2008), hue values and infrared spectra (Dove et al. 2007;  
244 Gamero et al. 2015), or porosity (a function of barb width and spacing, Rijke 1968, 1970; Rijke &  
245 Jesser 2011), are better descriptors of insulation capacity. The methodology applied in this study  
246 was used because it was cost effective and easily adapted to an unconventional lab space. Other  
247 traits worth investigation are barbule density and feather microstructure (D'alba et al. 2017) of  
248 *M. armata* down and contour feathers. An attempt was made to measure feather barbule  
249 density for this study; however, the power of the microscope used was not sufficient to be able  
250 to reliably quantify these incredibly minute structures.

251 Trends in the literature show that analyzing feather structural characteristics is a growing  
252 field with a wealth of potential questions that may be answered. Our findings are consistent  
253 with a recent phylogenetic review that found no observable differences in the barb density of  
254 plumulaceous and pennaceous sections of contour feathers in aquatic birds across  
255 environments (Pap et al. 2017). Since *M. armata* are specialized to a similar habitat type, fast  
256 flowing torrential rivers (Johnson 1963), there is no *a priori* reason to expect contour feathers  
257 (i.e., the protective layer of plumage) to differ between low- and high-altitude populations. In  
258 contrast to the contour feathers, the insulative down may be more sensitive to environmental  
259 temperatures, particularly in aquatic birds. Common garden approaches with passerines have  
260 shown that birds from higher latitudes with denser insulative plumage expend less energy on  
261 thermoregulation than conspecifics from lower latitudes (Broggi et al. 2005, 2011). Comparative  
262 studies between species have also shown that feather characteristics likely reflect the demands  
263 of habitat, as aquatic species appear to prioritize waterproofing and plumage cohesion, whereas

264 terrestrial species show greater variation in insulative properties (Pap et al. 2017; D'alba et al.  
265 2017). Future work should build upon this by investigating patterns of plumage variation among  
266 populations between habitats, in addition to further comparison of species across habitats.

267 Our understanding of the importance of down plumage between species is limited as  
268 few studies have focused on environmental correlates influencing down structure (but see  
269 Williams, Hagelin, and Kooyman 2015; Pap et al. 2017; D'alba et al. 2017). Our findings  
270 represent a novel attempt to quantify interpopulation down feather structure between  
271 environments along an elevational gradient. Further investigation of down feather structure,  
272 particularly in waterfowl, would help to clarify if the observed pattern of longer, denser down  
273 plumage in colder environments is observed in other species. Studies investigating feather  
274 structure of species across elevational gradients to answer whether plumage is determined  
275 through evolutionary processes or a phenotypic plastic response to environmental differences  
276 should also be conducted.

277

## 278 CONCLUSION

279 We have shown that high-altitude *M. armata* have longer, denser down feathers in the  
280 pectoral tract compared to low-altitude individuals. Moreover, average plumage traits between  
281 localities appeared to vary more in the low-altitude population compared to the high-altitude  
282 individuals sampled (Table 1). This could indicate that *M. armata* plumage is more constrained  
283 by selection or developmental plasticity at higher elevations. Further investigation is needed to  
284 determine if this pattern is repeated across drainages. These data suggest that these animals  
285 are compensating for colder environments by increasing the insulative capacity of their down

286 plumage thereby potentially avoiding further energy expenditures through increased metabolic  
287 output for thermogenesis (Dawson et al. 2016; Ivy pers comm). The lack of observable  
288 differences in contour feathers may be related to strong constraints of the waterproof capability  
289 of this important outer plumage layer in a species that forages underwater. Further  
290 investigation is warranted to examine the microstructures of these feathers (D'alba et al. 2017),  
291 quantify insulative capacity of the plumage (Walsberg 1988), and determine if these patterns  
292 between habitats are repeated across the latitudinal range of *M. armata* subspecies.

293

#### 294 **Acknowledgements**

295 Permits to conduct this research in Peru were provided by SERFOR (Permit: RDG no. 190-2015-  
296 SERFOR-DGGSPFFS), and authorization to work in the field was provided by the community of  
297 Vichaycocha, and private landowners in Santa Rosa de Quives (Fundo Huanchuy and Hostiliano  
298 family). Funding was provided by the University of Alaska Fairbanks Undergraduate Research  
299 and Scholarly Activity (URSA) program (awarded to R.C.) and the James A. Kushlan Endowment  
300 for Waterbird Biology and Conservation (awarded to K.G.M.) from the University of Miami. We  
301 thank G. R. Scott, W. K. Milsom, M. Reichert, B. Chua, J. York, and N. Dawson for logistical  
302 support in the field. We thank C. Ivy for physiological data and advice. We are grateful to I. León,  
303 L. Alza, C. Corzo, V. Zapata, L. Zapata, B. Alza, R. León, R. Zapata, C. Zapata, and J. Barbarán;  
304 Centro de Ornitología y Biodiversidad (T. Valqui, A. Díaz, A. Barboza, P. Venegas, G. Chávez, J.  
305 Chávez) for assistance and logistical support in Lima, Peru, and the Dallas World Aquarium (D.  
306 Richardson) for laboratory equipment. We would also like to thank D. Kotter for GIS help, and P.  
307 Turk for statistical consulting. As well as C. Ghalambor, C. Marshall, J. Harvid, J. Neuwald, and R.

308 Bockrath for comments on earlier drafts. We continuously thank K. Winker for enduring  
309 support.

310

## 311 REFERENCES

312 Alza, L, Bautista, E, Smith, M, Gutiérrez-Pinto, N, Astie, A & KG McCracken (2017) Capture  
313 efficiency of torrent ducks by the active mist-net method. *Wildlife Society Bulletin*, 41: 370–  
314 375.

315

316 Ayala, JGM (2013) Resultados del Segundo Monitoreo Participativo de la Calidad de Agua en la  
317 Cuenca del Río Chillón- Ministerio de Agricultura y Riego, Lima, Peru.

318

319 Block, BA (1994) Thermogenesis in muscle. *Annual Review of Physiology*, 56: 535–577.

320

321 Butler, LK, Rohwer, S & MG Speidel (2008) Quantifying structural variation in contour feathers to  
322 address functional variation and life history trade-offs. *Journal of Avian Biology*, 39: 629–639.

323

324 Butler, MW, Leppert, LL & AM Dufty Jr (2010) Effects of small increases in corticosterone levels  
325 on morphology, immune function, and feather development. *Physiological and Biochemical*  
326 *Zoology*, 83: 78–86.

327

- 328 Broggi, J, Gamero, A., Hohtola, E, Orel, IM & J-Å Nilsson (2011) Interpopulation variation in  
329 contour feather structure is environmentally determined in Great Tits. PlosOne, 6: e24942,  
330 doi:10.1371journal.pone.00224942  
331
- 332 Cerón, G, Trejo, A & M. Kun (2010) Feeding habits of torrent ducks (*Merganetta armata armata*)  
333 in Nahuel Huapi National Park, Argentina. Waterbirds, 33: 228–235.  
334
- 335 D’alba, L, Carlsen, TH, Ásgeirsson, Á, Shawkey, MD & JE Jónsson (2017) Contributions of feather  
336 microstructure to eider down insulation properties. Journal of Avian Biology, 48: 1150–1157.  
337
- 338 Davenport, J, O’Halloran, J, Hannah, F, McLaughlin, O & P Smiddy (2009) Comparison of  
339 plumages of white-throated dipper *Cinclus cinclus* and blackbird *Turdus merula*. Waterbirds, 32:  
340 169–178.  
341
- 342 Dawson, NJ, Ivy, CM, Alza, L, Cheek, R, York, JM, Chua, B, Milsom, WK, McCracken,  
343 KG & GR Scott (2016) Mitochondrial physiology in the skeletal and cardiac muscles is altered in  
344 torrent ducks, *Merganetta armata*, from high altitudes in the Andes. Journal of Experimental  
345 Biology, 219: 3719–3728.  
346
- 347 Dove, CJ, Rijke, AM, Wang, X & LS Andrews (2007) Infrared analysis of contour feathers: the  
348 conservation of body heat radiation in birds. Journal of Thermal Biology, 32: 42–46.  
349



350 Fjeldså, J, & K Niels (1990) Birds of the high Andes. Zoological Museum, University of  
351 Copenhagen, Copenhagen, Denmark, pp. 121–122.  
352

353 Gamero, A, Senar, JC, Hohtola, E, Nilsson, J-Å & L Broggi (2015) Population differences in the  
354 structure and coloration of great tit contour feathers. Biological Journal of the Linnean Society,  
355 114: 82–91.  
356

357 Gutiérrez-Pinto, N, McCracken, KG, Alza, L, Tubaro, P., Kopuchian, C, Astie, A & CD Cadena  
358 (2014) The validity of ecogeographical rules is context dependent: testing for Bergmann’s and  
359 Allen’s rules by latitude and elevation in a widespread Andean duck. Biological Journal of the  
360 Linnean Society, 111: 850–862.  
361

362 Johnson, AW (1963) Notes on the distribution, reproduction and display of the Andean torrent  
363 duck, *Merganetta armata*. Ibis, 105:114–116.  
364

365 Koskenpato, K, Ahola, A, Karstinen, T & P Karell (2016) Is the denser contour feather structure in  
366 pale grey than in pheomelanic Brown tawny owls (*Strix aluco*) an adaptation to cold  
367 environments? Journal of Avian Biology, 47: 1–6.  
368

369 Krzywinski, M & N Altman (2014) Visualizing samples with box plots. Nature Methods, 11: 119–  
370 120.  
371

- 372 McKinney, RA & SR McWilliams (2005) A new model to estimate daily energy expenditure for  
373 wintering waterfowl. *The Wilson Bulletin*, 117: 44–55.
- 374 Middleton, ALA (1986) Seasonal changes in plumage structure and body composition of the  
375 american goldfinch, *Carduelis tristis*. *Canadian Field-Naturalist*, 100: 545–549.
- 376
- 377 Moffet, GM (1970) A study of nesting torrent ducks in the Andes. *The Living Bird*, 9: 5–27.
- 378
- 379 Moreno-Rueda, G (2010) Experimental test of a trade-off between moult and immune response  
380 in house sparrows *Passer domesticus*. *Journal of Evolutionary Biology*, 23: 2229–2237.
- 381
- 382 Murphy, ME & JR King (1992) Energy and nutrient use during molt by white-crowned sparrows  
383 *Zonotrichia leucophrys gambelii*. *Ornis Scandinavica*, 23: 304–313.
- 384
- 385 Ostrom, JH (1974) Archaeopteryx and the Origin of Flight. *The Quarterly Review of Biology*, 49:  
386 27–47.
- 387
- 388 Pap, PL, Vágási, CI, Czirják, GA & Z Barta (2008) Diet quality affects postnuptial molting and  
389 feather quality of the house sparrow (*Passer domesticus*): interaction with humoral immune  
390 function? *Canadian Journal of Zoology*, 86: 834–842.
- 391

392 Pap, PL, Vágási, CI, Barbos L. & A. Marton (2013) Chronic coccidian infestation compromises  
393 flight feather quality in house sparrows *Passer domesticus*. Biological Journal of the Linnean  
394 Society, 108: 414–428.

395  
396 Pap, PL, Vincze, O, Wekerle, B, Daubner, T, Vágási, CI, Nudds, RL, Dyke, GJ & G Osváth (2017) A  
397 phylogenetic comparative analysis reveals correlations between body feather structure and  
398 habitat. Functional Ecology, 31: 1241–1251.

399  
400 Peel, MC, Finlayson, BL & TA McMahon (2007) Updated world map of the Köppen-Geiger  
401 climate classification. Hydrology and Earth System Science, 11: 1633–1644.

402  
403 Petit, M, & F Vézina (2014) Phenotype manipulations confirm the role of pectoral muscles and  
404 haematocrit in avian maximal thermogenic capacity. Journal of Experimental Biology, 217: 824–  
405 830.

406  
407 Prum, RO, & AH Brush (2002) The evolutionary origin and diversification of feathers. The  
408 Quarterly Review of Biology, 77: 261–295.

409  
410 R Core Team (2013) R: A language and environment for statistical computing. - R Foundation for  
411 Statistical Computing. Vienna, Austria. Available at <http://www.R-project.org/>

412

- 413 Rijke, A (1968) The water repellency and feather structure of cormorants, Phalacrocoracidae-  
414 Journal of Experimental Biology, 48: 185–189.  
415
- 416 Rijke, AM (1970) Wettability and phylogenetic development of feather structure in water birds –  
417 Journal of Experimental Biology, 52: 469–479.  
418
- 419 Rijke, AM & WA Jesser (2011) The water penetration and repellency of feathers revisited.  
420 Condor, 113: 245–254.  
421
- 422 Schneider, CA, Rasband, WS & KW Eliceiri (2012) NIH Image to ImageJ: 25 years of image  
423 analysis. Nature Methods, 9: 671–675.  
424
- 425 Stephenson, R., & CA Andrews (1997) The effect of water surface tension on feather wettability  
426 in aquatic birds. Canadian Journal of Zoology, 74: 288–294.  
427
- 428 Stettenheim, PR (2000) The integumentary morphology of modern birds—An overview.  
429 American Zoologist, 40: 461–477.  
430
- 431 Stročlic, DE & LM Romero (2008) The effects of chronic psychological and physical stress on  
432 feather replacement in European starlings (*Sturnus vulgaris*). Comparative Biochemistry and  
433 Physiology, 149A: 68–79.  
434

435 Vargas, JCC (2015) Remisión de Informe Técnico del “Segundo Monitoreo Participativo de  
436 Calidad del Agua Superficial en la Cuenca Chancay-Huaral-2013”, Realizado del 02 al 08 de Mayo  
437 de 2013. Ministerio de Agricultura y Riego, Lima, Peru.

438

439 Walsberg, GE & JR King (1978) The relationship of the external surface area of birds to skin  
440 surface area and body mass. *Journal of Experimental Biology*, 76: 185–189.

441

442 Walsberg, GE (1988) Heat flow through avian plumages: the relative importance of conduction,  
443 convection, and radiation. *Journal of Thermal Biology*, 13: 89–92.

444

445 Wetmore, A (1936) The number of contour feathers in Passeriform and related birds. *Auk*, 53:  
446 159–169.

447

448 Williams, CL, Hagelin, JC & GL Kooyman (2015) Hidden keys to survival: the type, density,  
449 pattern and functional role of emperor penguin body feathers. *Proceedings of the Royal Society*  
450 *Bulletin: Biological Sciences*, 282: 2015–2033.

451

452

453

454

455

456 Table 1. Coefficient of variation (CV) of feather structure trait averaged between low-altitude  
457 and high-altitude populations of adult male *Merganetta armata* from Lima, Peru.

|                             | <b>Down length<br/>(mm)</b> | <b>Down barb<br/>number</b> | <b>Contour total<br/>length (mm)</b> | <b>Contour<br/>proportion<br/>plumulaceous</b> | <b>Contour barb<br/>number-<br/>plumulaceous</b> | <b>Contour barb<br/>number -<br/>pennaceous</b> |
|-----------------------------|-----------------------------|-----------------------------|--------------------------------------|------------------------------------------------|--------------------------------------------------|-------------------------------------------------|
| <b>CV low<br/>altitude</b>  | <b>0.0625</b>               | <b>0.0590</b>               | <b>0.0713</b>                        | 0.0314                                         | <b>0.0966</b>                                    | <b>0.0613</b>                                   |
| <b>CV high<br/>altitude</b> | 0.0531                      | 0.0286                      | 0.0492                               | <b>0.0411</b>                                  | 0.0369                                           | 0.0457                                          |

458

459

460

461

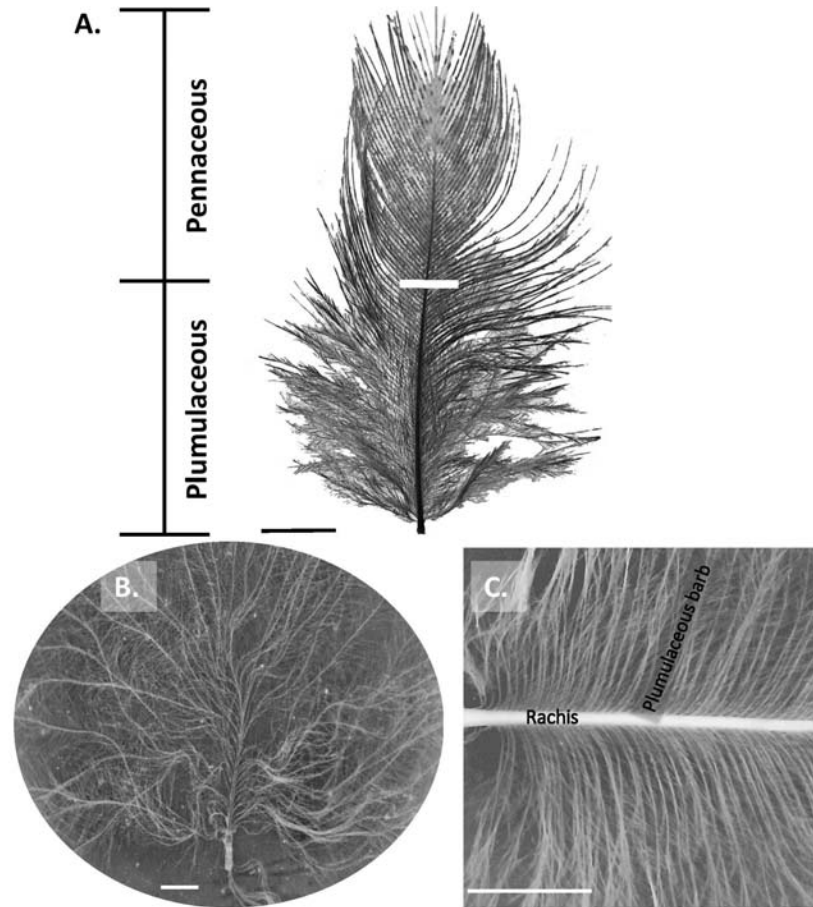

462

463 Figure 1. Body feathers of *Merganetta armata* with plumulaceous and pennaceous sections  
464 separated by a white stripe across the rachis. The black lines define the boundary of the distal  
465 pennaceous and the proximal plumulaceous portions of the feather (A). Lower figures illustrate  
466 *M. armata* down (B), and a section of plumulaceous vane with the rachis and barb (C). Scale  
467 (white bars) for figure (A) and (C) are 0.5 cm, and (B) is 1 mm.

468

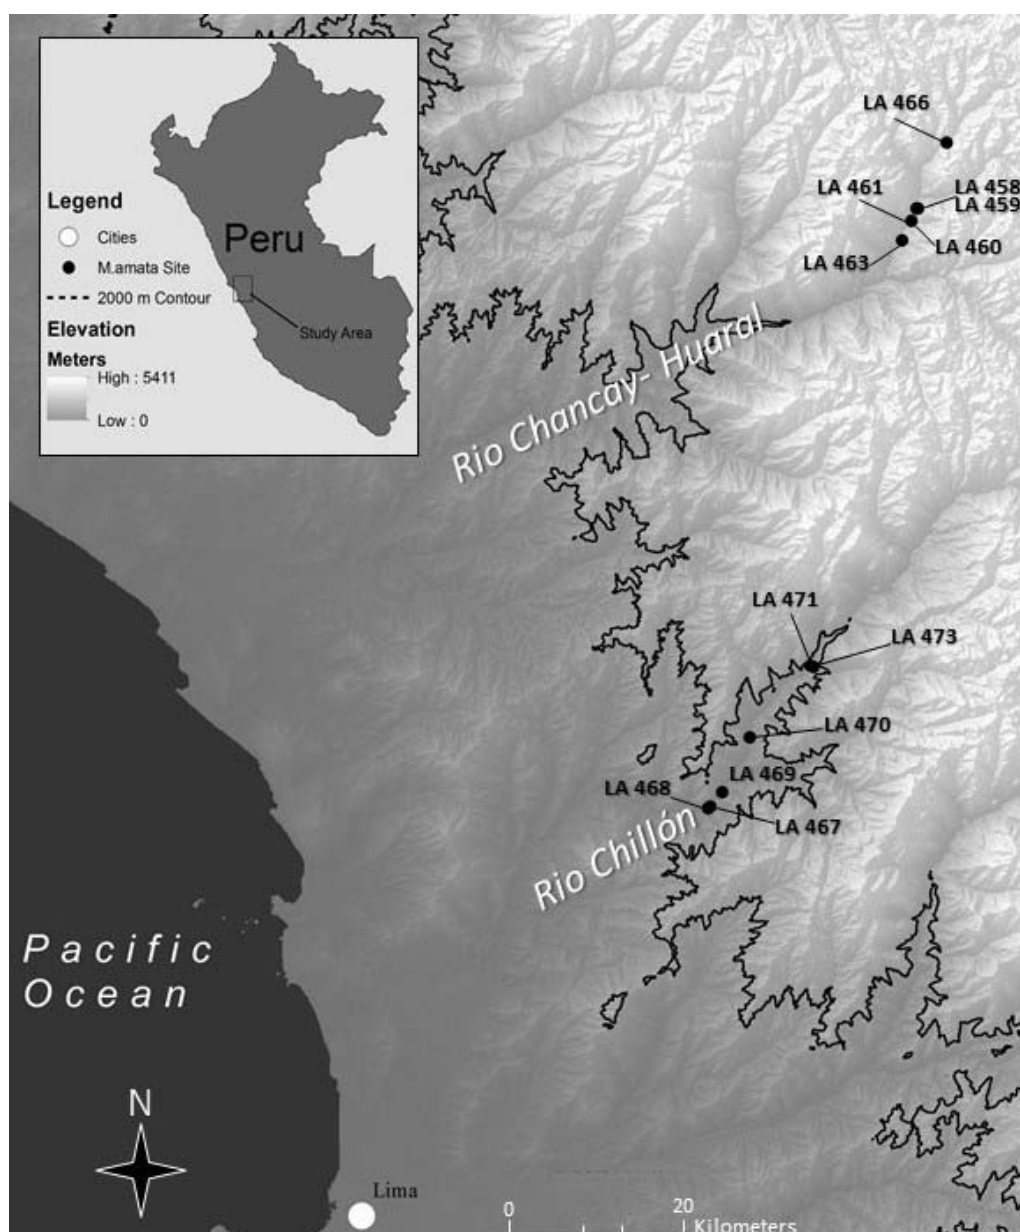

469  
470 Figure 2. Map of the study areas showing the collection sites of the twelve sampled *Merganetta*  
471 *armata* individuals (Appendix) along the Chillón River (low-altitude population) and Chancay-  
472 Huaral River (high-altitude population) in the Department of Lima, Peru.



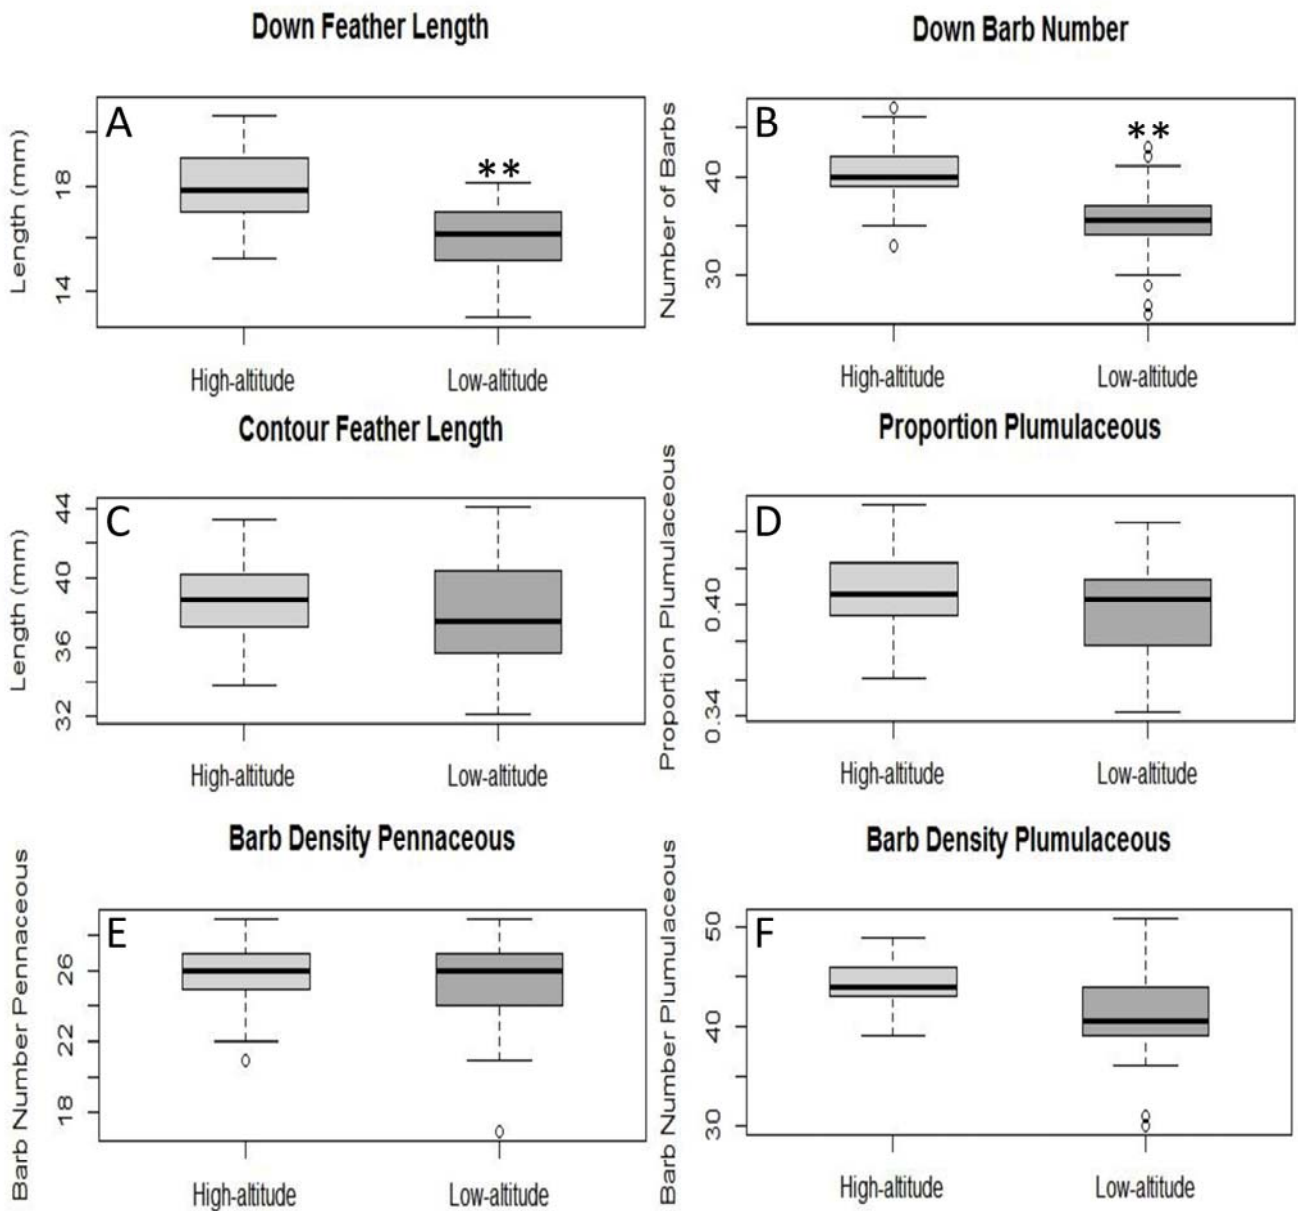

473  
474 Figure 3. Differences observed in six structural traits of down and contour feathers from the  
475 upper right pectoral tracts of twelve adult male *Merganetta armata* from our high-altitude (light  
476 grey), and low-altitude (dark grey) localities in Lima, Peru. Asterisks (\*) indicate significant  
477 differences between the two populations. Levels of significance: \* $P < 0.05$ ; \*\* $P < 0.01$ .  
478

479 APPENDIX

480 Adult male specimens used in this study with collector's identifiers (Luis Alza [LA]) catalogue

481 numbers. Collection localities are also included. All voucher specimens are housed in the Centro

482 de Ornitología y Biodiversidad (CORBIDI) ornithology collection, in Lima, Peru.

| Species                  | Locality                  | Latitude S | Longitude W | Elevation<br>(meters) | Date collected | Catalogue number |
|--------------------------|---------------------------|------------|-------------|-----------------------|----------------|------------------|
| <b>High-altitude</b>     | <b>Rio-Chancay-Huaral</b> |            |             |                       |                |                  |
| <i>Merganetta armata</i> | Vichaycocha               | 11.15983   | 76.62881    | 3680                  | 7 Aug 2015     | LA 458           |
| <i>Merganetta armata</i> | Vichaycocha               | 11.15983   | 76.62881    | 3680                  | 7 Aug 2015     | LA 459           |
| <i>Merganetta armata</i> | Baños de Collpa           | 11.17059   | 76.63445    | 3193                  | 8 Aug 2015     | LA 460           |
| <i>Merganetta armata</i> | Vichaycocha               | 11.15981   | 76.62981    | 3299                  | 8 Aug 2015     | LA 461           |
| <i>Merganetta armata</i> | Vichaycocha               | 11.18813   | 76.64276    | 3000                  | 9 Aug 2015     | LA 463           |
| <i>Merganetta armata</i> | Vichaycocha               | 11.10174   | 76.60341    | 4086                  | 10 Aug 2015    | LA 466           |
| <b>Low-altitude</b>      | <b>Rio Chillón</b>        |            |             |                       |                |                  |
| <i>Merganetta armata</i> | Santa Rosa de<br>Quives   | 11.67533   | 76.80168    | 1092                  | 12 Aug 2015    | LA 467           |
| <i>Merganetta armata</i> | Santa Rosa de<br>Quives   | 11.68945   | 76.81411    | 1034                  | 13 Aug 2015    | LA 468           |
| <i>Merganetta armata</i> | Santa Rosa de<br>Quives   | 11.68801   | 76.81205    | 1040                  | 14 Aug 2015    | LA 469           |
| <i>Merganetta armata</i> | Fundo Huanchuy            | 11.62689   | 76.77708    | 1248                  | 15 Aug 2015    | LA 470           |
| <i>Merganetta armata</i> | Yaso                      | 11.56482   | 76.72112    | 1665                  | 15 Aug 2015    | LA 471           |
| <i>Merganetta armata</i> | Yaso                      | 11.56362   | 76.72347    | 1615                  | 16 Aug 2015    | LA 473           |

483
